# Supplementary material
Source: PubMed Central journal article supplement (PMC3243576)
Supplement: supp_mcm058_mcm058supp.pdf [file supp_mcm058_mcm058supp.pdf]

The complete data set showing the number of galls and *Meloidogyne incognita* egg masses counted for each of the six replicate *Lotus japonicus* plants tested per ecotype. Each accession (MG-) is numbered after the code used by the National BioResource Project, Japan (<http://www.shigen.nig.ac.jp/legume/legumebase/index.jsp>). Other ecotype features such as the geographical location of collection and phenotypic characteristics of the ecotypes used in this study are available on its website. Also shown is the fresh weight of roots for all plants tested.

---

| <i>L. japonicus</i> MG- | No. of galls | Egg masses | Root fresh weight (g) |
|-------------------------|--------------|------------|-----------------------|
| 1.2                     | 67           | 4          | 2.65                  |
| 1.3                     | 4            | 0          | 4.32                  |
| 1.4                     | 62           | 4          | 5.11                  |
| 1.5                     | 60           | 20         | 4.46                  |
| 1.6                     | 27           | 4          | 6.16                  |
| 2.4                     | 80           | 12         | 6.74                  |
| 2.5                     | 1            | 0          | 0.93                  |
| 3.1                     | 48           | 5          | 9.8                   |
| 3.2                     | 1            | 0          | 5.69                  |
| 3.3                     | 4            | 1          | 5.77                  |
| 3.4                     | 2            | 1          | 7                     |
| 3.5                     | 37           | 2          | 7.72                  |
| 3.6                     | 13           | 3          | 9.72                  |
| 4.1                     | 101          | 2          | 5.54                  |
| 4.2                     | 61           | 3          | 10.4                  |
| 4.3                     | 28           | 1          | 4.71                  |
| 4.5                     | 15           | 11         | 7.2                   |
| 4.6                     | 9            | 1          | 4.75                  |
| 5.1                     | 163          | 7          | 10.62                 |
| 5.3                     | 3            | 0          | 3.23                  |
| 5.4                     | 64           | 17         | 2.23                  |
| 15.1                    | 66           | 12         | 10.54                 |
| 15.2                    | 44           | 2          | 12.92                 |
| 15.3                    | 17           | 4          | 5.18                  |

|      |     |    |       |
|------|-----|----|-------|
| 15.4 | 51  | 7  | 15.71 |
| 15.5 | 254 | 12 | 13.29 |
| 15.6 | 14  | 5  | 8.21  |
| 16.1 | 547 | 10 | 7.89  |
| 16.3 | 166 | 44 | 9.05  |
| 16.4 | 63  | 0  | 6.2   |
| 16.5 | 214 | 26 | 5.35  |
| 16.6 | 55  | 3  | 6.02  |
| 17.1 | 386 | 14 | 5.84  |
| 17.2 | 67  | 6  | 3.38  |
| 17.3 | 88  | 1  | 5.13  |
| 17.4 | 48  | 6  | 4.22  |
| 17.5 | 200 | 17 | 4.06  |
| 17.6 | 68  | 6  | 4.74  |
| 18.1 | 265 | 2  | 6.82  |
| 18.2 | 108 | 3  | 5.64  |
| 18.3 | 9   | 0  | 4.47  |
| 18.4 | 5   | 1  | 6.65  |
| 18.5 | 419 | 11 | 7.94  |
| 18.6 | 26  | 4  | 2.87  |
| 19.1 | 29  | 5  | 4.53  |
| 19.2 | 167 | 0  | 5.27  |
| 19.3 | 140 | 0  | 5.63  |
| 19.4 | 171 | 11 | 5.53  |
| 19.5 | 30  | 2  | 4.1   |
| 29.1 | 589 | 57 | 6     |
| 29.2 | 461 | 15 | 9.2   |
| 29.3 | 171 | 9  | 6.08  |
| 29.4 | 254 | 15 | 8.48  |
| 29.5 | 410 | 45 | 7.15  |
| 29.6 | 484 | 38 | 11.85 |
| 35.1 | 0   | 0  | 1.68  |
| 35.2 | 359 | 4  | 4.23  |

|      |      |     |       |
|------|------|-----|-------|
| 35.3 | 97   | 13  | 1.2   |
| 35.4 | 256  | 25  | 1.49  |
| 35.6 | 104  | 2   | 1.5   |
| 36.1 | 174  | 6   | 2.86  |
| 36.2 | 27   | 0   | 1.72  |
| 36.3 | 0    | 0   | 2.12  |
| 36.4 | 38   | 5   | 3.12  |
| 36.5 | 11   | 3   | 2.89  |
| 36.6 | 12   | 1   | 2.33  |
| 38.1 | 637  | 19  | 15.67 |
| 38.2 | 100  | 8   | 7.07  |
| 38.3 | 91   | 10  | 16.55 |
| 38.4 | 1038 | 137 | 10.14 |
| 38.5 | 146  | 39  | 8.78  |
| 38.6 | 103  | 4   | 9.92  |
| 39.2 | 295  | 15  | 9.33  |
| 39.3 | 605  | 21  | 7.24  |
| 39.4 | 31   | 5   | 1.38  |
| 39.5 | 172  | 6   | 7.72  |
| 39.6 | 420  | 19  | 5.77  |
| 40.1 | 96   | 5   | 2.91  |
| 40.2 | 193  | 11  | 3.53  |
| 40.3 | 166  | 28  | 1.71  |
| 40.4 | 361  | 32  | 5.5   |
| 40.5 | 270  | 21  | 3.65  |
| 40.6 | 24   | 1   | 3.78  |
| 41.1 | 385  | 138 | 6.56  |
| 41.2 | 157  | 11  | 4.93  |
| 41.3 | 231  | 14  | 6.08  |
| 41.4 | 232  | 24  | 8.9   |
| 41.5 | 57   | 4   | 8.18  |
| 41.6 | 1006 | 38  | 9.85  |
| 42.1 | 206  | 5   | 4.53  |

|      |     |    |       |
|------|-----|----|-------|
| 42.2 | 65  | 0  | 8.02  |
| 42.3 | 5   | 1  | 3.64  |
| 42.4 | 241 | 19 | 4.66  |
| 42.5 | 343 | 97 | 4.25  |
| 42.6 | 63  | 8  | 5.28  |
| 44.2 | 143 | 8  | 5.96  |
| 44.3 | 96  | 5  | 3.95  |
| 44.4 | 66  | 10 | 4.68  |
| 44.5 | 102 | 22 | 5.04  |
| 44.6 | 436 | 40 | 6.23  |
| 46.1 | 512 | 19 | 9.11  |
| 46.2 | 354 | 16 | 4.51  |
| 46.3 | 479 | 60 | 9.98  |
| 46.4 | 301 | 56 | 5.07  |
| 46.5 | 454 | 29 | 9.71  |
| 46.6 | 82  | 2  | 7.35  |
| 49.1 | 11  | 6  | 22.32 |
| 49.2 | 3   | 1  | 18.05 |
| 49.3 | 0   | 0  | 7.44  |
| 49.4 | 2   | 0  | 11.4  |
| 49.5 | 1   | 0  | 15.38 |
| 49.6 | 4   | 1  | 12.57 |
| 51.1 | 3   | 1  | 13.8  |
| 51.3 | 5   | 1  | 9.44  |
| 51.4 | 1   | 0  | 8.32  |
| 51.5 | 10  | 1  | 10.22 |
| 51.6 | 3   | 0  | 11.85 |
| 52.1 | 6   | 3  | 21.25 |
| 52.2 | 1   | 0  | 7.81  |
| 52.3 | 4   | 2  | 10.94 |
| 52.4 | 5   | 3  | 6.01  |
| 52.5 | 1   | 1  | 13.37 |
| 52.6 | 0   | 0  | 9     |

|      |     |    |       |
|------|-----|----|-------|
| 53.1 | 27  | 0  | 21.1  |
| 53.2 | 2   | 0  | 13.34 |
| 53.3 | 14  | 2  | 10    |
| 53.5 | 9   | 5  | 14.08 |
| 53.6 | 2   | 1  | 16.35 |
| 55.1 | 7   | 0  | 10.8  |
| 55.2 | 2   | 1  | 8.28  |
| 55.3 | 1   | 0  | 7.67  |
| 55.4 | 1   | 0  | 5.84  |
| 55.5 | 0   | 0  | 10.42 |
| 55.6 | 1   | 1  | 9.44  |
| 56.1 | 50  | 5  | 9.63  |
| 56.2 | 27  | 1  | 7.78  |
| 56.3 | 38  | 0  | 9.36  |
| 56.4 | 25  | 4  | 7.1   |
| 56.5 | 34  | 4  | 6.78  |
| 56.6 | 4   | 2  | 7.54  |
| 57.1 | 46  | 13 | 10.71 |
| 57.2 | 3   | 0  | 7.88  |
| 57.4 | 281 | 10 | 7.81  |
| 57.5 | 270 | 16 | 12.78 |
| 57.6 | 16  | 5  | 10.24 |
| 58.1 | 52  | 23 | 8.22  |
| 58.2 | 12  | 0  | 8.46  |
| 58.3 | 5   | 1  | 8.93  |
| 58.4 | 93  | 16 | 4.16  |
| 58.5 | 15  | 7  | 7.43  |
| 58.6 | 10  | 7  | 11.07 |
| 61.1 | 80  | 7  | 4.27  |
| 61.2 | 33  | 11 | 4.18  |
| 61.3 | 53  | 1  | 4.35  |
| 61.5 | 68  | 5  | 3.56  |
| 61.6 | 2   | 0  | 2.37  |

|      |     |    |       |
|------|-----|----|-------|
| 62.1 | 114 | 2  | 4.3   |
| 62.2 | 1   | 0  | 10.05 |
| 62.3 | 0   | 0  | 5.92  |
| 62.4 | 4   | 1  | 4.95  |
| 62.5 | 2   | 1  | 8.03  |
| 62.6 | 0   | 0  | 9.51  |
| 71.1 | 0   | 0  | 9.51  |
| 71.2 | 0   | 0  | 5.43  |
| 71.3 | 49  | 15 | 13.08 |
| 71.4 | 22  | 2  | 8.1   |
| 71.5 | 0   | 0  | 7.3   |
| 71.6 | 1   | 1  | 6.72  |
| 72.1 | 80  | 9  | 3.7   |
| 72.2 | 3   | 0  | 8.44  |
| 72.3 | 3   | 2  | 7.15  |
| 72.4 | 18  | 6  | 5.4   |
| 74.1 | 96  | 5  | 5.59  |
| 74.2 | 60  | 0  | 9.42  |
| 74.3 | 335 | 9  | 11.41 |
| 74.4 | 10  | 0  | 9.12  |
| 74.5 | 84  | 5  | 10.38 |
| 74.6 | 3   | 1  | 18.46 |
| 76.1 | 98  | 4  | 5.71  |
| 76.2 | 193 | 0  | 5.02  |
| 76.3 | 139 | 16 | 6.45  |
| 76.4 | 485 | 11 | 7.5   |
| 76.5 | 165 | 7  | 8.8   |
| 76.6 | 266 | 4  | 10.07 |
| 77.1 | 17  | 2  | 4.98  |
| 77.2 | 7   | 0  | 8.55  |
| 77.3 | 80  | 0  | 4.88  |
| 77.4 | 312 | 77 | 6.57  |
| 77.5 | 139 | 9  | 4.14  |

|      |     |    |       |
|------|-----|----|-------|
| 77.6 | 24  | 5  | 6.92  |
| 78.1 | 199 | 6  | 9.98  |
| 78.2 | 50  | 10 | 11.75 |
| 78.3 | 36  | 6  | 6     |
| 78.4 | 45  | 11 | 5.46  |
| 78.5 | 38  | 24 | 7.91  |
| 78.6 | 13  | 6  | 8.99  |
| 79.1 | 0   | 0  | 3.75  |
| 79.2 | 105 | 14 | 5.88  |
| 79.3 | 4   | 4  | 6.21  |
| 79.4 | 5   | 0  | 3.7   |
| 79.5 | 0   | 0  | 5.46  |
| 79.6 | 7   | 0  | 7.13  |
| 80.1 | 41  | 8  | 9.83  |
| 80.3 | 29  | 0  | 7.9   |
| 80.4 | 154 | 20 | 9.31  |
| 80.5 | 25  | 18 | 7.54  |
| 80.6 | 4   | 1  | 10.66 |
| 81.1 | 513 | 54 | 7.74  |
| 81.2 | 278 | 28 | 7.94  |
| 81.3 | 32  | 2  | 5.52  |
| 81.4 | 190 | 16 | 7.88  |
| 81.5 | 50  | 6  | 7.83  |
| 81.6 | 13  | 0  | 7.69  |
| 82.1 | 5   | 0  | 7.84  |
| 82.2 | 0   | 0  | 6.24  |
| 82.3 | 4   | 0  | 6.24  |
| 82.4 | 6   | 5  | 6.32  |
| 82.6 | 1   | 1  | 5.54  |
| 83.1 | 378 | 29 | 13.2  |
| 83.2 | 275 | 22 | 9.24  |
| 83.3 | 34  | 1  | 5.73  |
| 83.4 | 372 | 27 | 11.2  |

|      |     |    |       |
|------|-----|----|-------|
| 83.5 | 108 | 10 | 11.25 |
| 83.6 | 9   | 2  | 11.92 |
| 84.1 | 390 | 12 | 9.31  |
| 84.2 | 94  | 12 | 12.5  |
| 84.3 | 290 | 11 | 12.11 |
| 84.4 | 189 | 16 | 12.8  |
| 84.5 | 421 | 8  | 16.26 |
| 84.6 | 20  | 5  | 16.53 |
| 85.1 | 45  | 52 | 0.35  |
| 85.2 | 30  | 2  | 8.95  |
| 85.3 | 237 | 9  | 8.9   |
| 85.4 | 653 | 40 | 9.12  |
| 85.5 | 190 | 46 | 0.84  |
| 85.6 | 161 | 11 | 7     |
| 87.1 | 45  | 9  | 3.5   |
| 87.2 | 305 | 26 | 4.8   |
| 87.3 | 461 | 5  | 4.2   |
| 87.4 | 180 | 17 | 6.91  |
| 87.5 | 641 | 53 | 7.77  |
| 87.6 | 354 | 14 | 5.16  |
| 88.1 | 163 | 2  | 15.32 |
| 88.2 | 35  | 5  | 8.27  |
| 88.3 | 539 | 51 | 7.93  |
| 88.5 | 177 | 21 | 9.61  |
| 88.6 | 67  | 1  | 13.61 |
| 89.1 | 28  | 2  | 18.15 |
| 89.2 | 19  | 0  | 5.27  |
| 89.3 | *   | *  | *     |
| 89.4 | 608 | 54 | 6.78  |
| 89.5 | 84  | 5  | 5.71  |
| 89.6 | 435 | 42 | 5.71  |
| 91.1 | 586 | 55 | 5.02  |
| 91.2 | 37  | 10 | 1.38  |



|      |     |     |       |
|------|-----|-----|-------|
| 91.3 | 254 | 17  | 8.98  |
| 91.5 | 646 | 45  | 6.92  |
| 91.6 | 678 | 8   | 7.88  |
| 92.1 | 254 | 44  | 1.16  |
| 92.2 | 174 | 6   | 2.88  |
| 92.3 | 131 | 15  | 3.21  |
| 92.4 | 274 | 6   | 4.5   |
| 92.5 | 371 | 26  | 2.86  |
| 92.6 | 200 | 19  | 1.53  |
| 93.1 | 648 | 30  | 7.12  |
| 93.2 | 21  | 0   | 9.28  |
| 93.3 | 59  | 2   | 10.63 |
| 93.4 | 422 | 6   | 9.54  |
| 93.5 | 409 | 6   | 7.7   |
| 94.1 | 52  | 17  | 12.75 |
| 94.2 | 325 | 19  | 5.95  |
| 94.3 | 44  | 2   | 5.48  |
| 94.4 | 21  | 2   | 9.09  |
| 94.5 | 40  | 9   | 8.98  |
| 94.6 | 20  | 3   | 7.28  |
| 95.1 | 432 | 29  | 17.97 |
| 95.3 | 343 | 34  | 4.49  |
| 95.4 | 561 | 128 | 7.27  |
| 96.1 | 590 | 57  | 5.67  |
| 96.2 | 332 | 34  | 2.73  |
| 96.3 | 674 | 70  | 8.93  |
| 96.4 | 164 | 3   | 2.58  |
| 96.5 | 500 | 35  | 6.12  |
| 96.6 | 176 | 6   | 4.48  |
| 97.1 | 143 | 19  | 3.27  |
| 97.2 | 347 | 8   | 8.92  |
| 97.3 | 169 | 2   | 7.95  |
| 97.4 | 443 | 35  | 6.73  |

|       |      |     |       |
|-------|------|-----|-------|
| 97.5  | 137  | 13  | 10.22 |
| 97.6  | 14   | 0   | 6.57  |
| 98.1  | 383  | 32  | 7.89  |
| 99.1  | 666  | 13  | 10.12 |
| 99.2  | 271  | 11  | 10.88 |
| 99.3  | 37   | 12  | 7.06  |
| 99.4  | 22   | 3   | 8.61  |
| 99.5  | 8    | 1   | 6.36  |
| 99.6  | 33   | 2   | 10.91 |
| 100.1 | 618  | 9   | 7.13  |
| 100.2 | 115  | 6   | 5.5   |
| 100.3 | 271  | 21  | 9.13  |
| 100.4 | 1040 | 39  | 6.82  |
| 100.5 | 820  | 111 | 9.22  |
| 100.6 | 59   | 5   | 8.08  |
| 101.1 | 625  | 60  | 3.7   |
| 101.2 | 582  | 29  | 6.06  |
| 101.3 | 316  | 10  | 9.67  |
| 101.4 | 609  | 45  | 7.8   |
| 101.5 | 592  | 38  | 7.4   |
| 101.6 | 142  | 15  | 13.15 |
| 104.1 | 294  | 15  | 7.7   |
| 104.2 | 103  | 8   | 9.86  |
| 104.3 | 160  | 16  | 6.61  |
| 104.4 | 310  | 18  | 7.67  |
| 104.6 | 71   | 8   | 5.68  |
| 107.1 | 129  | 45  | 5.6   |
| 107.2 | 806  | 104 | 6.6   |
| 107.3 | 311  | 51  | 4.9   |
| 107.4 | 9    | 4   | 4.75  |
| 107.5 | 193  | 20  | 6.27  |
| 107.6 | 24   | 0   | 4.85  |

---
